1 **Investigating spatial variability in COVID-19 pandemic**  
2 **severity across 19 geographic areas, Spain, 2020**

3

4

5 **Authors:**

6 Sushma Dahal<sup>a\*</sup>, Kenji Mizumoto<sup>b,c\*</sup>, Richard Rothenberg<sup>a</sup>, Gerardo Chowell<sup>a</sup>

7 \*Joint first authors

8

9 <sup>a</sup> Department of Population Health Sciences, School of Public Health, Georgia State

10 University, Atlanta, Georgia, USA

11 <sup>b</sup> Graduate School of Advanced Integrated Studies in Human Survivability, Kyoto University

12 Yoshida-Nakaadachi-cho, Sakyo-ku, Kyoto, Japan

13 <sup>c</sup> Hakubi Center for Advanced Research, Kyoto University, Yoshidahonmachi, Sakyo-ku,

14 Kyoto, Japan

15

16 **Article type:**

17 Major Article

18

19 **Address for correspondence:**

20 K Mizumoto, Graduate School of Advanced Integrated Studies in Human Survivability,

21 Kyoto University Yoshida-Nakaadachi-cho, Sakyo-ku, Kyoto, Japan, Tel: +81 75 762 2001

22 Fax: +81 75 762 2277, E-mail: mizumoto.kenji.5a@kyoto-u.ac.jp

23

24 **Word count:**

25 Abstract: 200 (Max 200)

26 Main: 2883

27 **Abstract**

28 **Introduction:** Spain has been disproportionately affected by the COVID-19 pandemic with  
29 the second highest death toll in the world after Italy. Here we analyzed estimates of pandemic  
30 severity and investigated how different factors shaped the severity of the COVID-19 pandemic.

31 **Methods:** We retrieved the daily cumulative numbers of laboratory-confirmed COVID-19  
32 cases and deaths in Spain from February 20, 2020 to April 2, 2020. We used statistical methods  
33 to estimate the time-delay adjusted case fatality ratio (CFR) for 17 autonomous communities  
34 and 2 autonomous cities of Spain. We then assessed how transmission and sociodemographic  
35 variables were associated with the CFR across areas in Spain using multivariate regression  
36 analysis.

37 **Results:** We estimated the highest time-delay-adjusted CFR for Madrid (38.4%) and the  
38 average adjusted CFR in Spain at 23.9%. Our multivariate regression analysis revealed a  
39 statistically significant three predictor variables: infant mortality rate, poverty risk rate and the  
40 cumulative morbidity rate.

41 **Conclusions:**

42 Our estimates of the time-delay adjusted CFR for 12 autonomous communities/cities in Spain  
43 are significantly higher than those previously estimated for other geographic regions including  
44 China and Korea. Our results call for urgent public health interventions focusing on low  
45 socioeconomic groups to ameliorate the burden of the COVID-19 pandemic in Spain.

46

47 Key words: COVID-19, Spain, time-delay adjusted CFR, 2020

48

49 **Introduction**

50 Since the emergence of COVID-19 in Wuhan, China in December 2019, the novel coronavirus  
51 (SARS-CoV-2) continues to spread throughout the world, straining and overloading healthcare  
52 systems and causing substantial morbidity and mortality burden during a short time period [1].  
53 As of April 11 2020, 1,610,909 confirmed cases including 99,690 deaths attributed to  
54 COVID-19 have been reported from 212 countries/territories/areas [1]. While the number of  
55 COVID-19 cases and deaths in China have been on a downward trend since late February  
56 2020, the number of new reported cases soared in new hotspots in the US, Spain, Italy, France,  
57 the UK, and Iran. Thus far, Spain has reported the second highest death toll after Italy and  
58 second highest number of confirmed COVID-19 cases after the United States.

59

60 The case fatality ratio is a useful metric to assess pandemic severity, which is typically  
61 estimated as the proportion of deaths among the total number of cases attributed to the disease  
62 [2]. However, during the course of outbreak of an infectious disease outbreak such as  
63 COVID-19, real-time estimates of CFR need to be derived carefully since it is prone to  
64 ascertainment bias and right censoring [2, 3]. In particular, the disease spectrum for COVID-19  
65 ranges from asymptomatic and mild infections to severe cases that require hospitalization and  
66 specialized supportive care. This may lead to overestimation of the CFR among ascertained  
67 cases. On the other hand, there is a delay from illness onset to death for severe cases [4], which

68 could lead to an underestimation of the CFR [3, 5]. Therefore, statistical methods that help  
69 mitigate inherent biases in estimates of the CFR should be employed to accurately plan for  
70 medical resources such as ICU units and ventilators, which are essential resources to save the  
71 lives of critically ill patients [6-8].

72

73 Several studies have reported CFR estimates for COVID-19 [9-11]. Overall, these estimates  
74 have varied substantially across geographic regions even within the same country. For  
75 example, a recent study estimated the time-delay-adjusted CFR at 12.2% for the ground zero of  
76 the COVID-19 pandemic: the city of Wuhan [4], whereas for the most affected region in Italy  
77 (Northwest), the delay-adjusted CFR reached 23.0% [12]. The drivers behind the geographical  
78 variations in the severity of the COVID-19 pandemic are yet to be investigated but could  
79 provide critical information to mitigate the morbidity and mortality impact of this and future  
80 pandemics [13].

81

82 In this study we aim to estimate the severity of COVID-19 pandemic across 19 geographic  
83 areas in Spain and aim to explain how these estimates varied geographically as a function of  
84 underlying factors. For the real-time estimation of severity, we adjust for right censoring using  
85 established methods [14, 15] and report the estimates of the time-delay adjusted CFR of  
86 COVID-19 for 17 autonomous communities (Comunidades Autonomas, CCAA), and 2

87 autonomous cities of Spain as well as for the entire Spain. We then assessed the association  
88 between different transmission and socio-demographic factors and the estimated CFRs across  
89 areas using multivariate regression analyses.

90

## 91 **Methods**

92 **Study setting:** Spain is situated on the Iberian Peninsula and is divided into 17 autonomous  
93 communities (CCAA) and 2 African autonomous cities [16]. Ceuta and Melilla are the 2  
94 African autonomous cities whereas the 17 CCAA include: Andalucía, Aragon, Asturias,  
95 Balears, Canarias, Cantabria, Castilla-La Mancha, Castilla y Leon, Catalunya, C. Valenciana,  
96 Extremadura, Galicia, Madrid, Murcia, Navarra, Pais Vasco, La Rioja [16].

97 **Initial cases of COVID-19 in Spain:** The first case of COVID-19 in Spain was confirmed on 31st  
98 January, 2020 in La Gomera, Canary Islands in a person who was in contact with an infected  
99 person while in Germany [17]. By February 27, there were total 12 cases which increased to 45  
100 cases in March 1 and then continued to rise rapidly throughout the country [18].

## 101 **Data Sources:**

102 The Ministry of Health of Spain releases daily report on COVID-19 cases and deaths [19].  
103 From these reports we retrieved the daily cumulative numbers of reported  
104 laboratory-confirmed COVID-19 cases and deaths from February 20, 2020 to April 2, 2020.

105 We then stratified the data into 20 groups that included 17 CCAA, 2 African autonomous cities  
106 and for the entire Spain.

107

108 For each CCAA we obtained data on total population size, proportion of the population older  
109 than 60 years, proportion of population at risk of poverty, and infant mortality rates from the  
110 Statistics National Institute (Instituto Nacional de Estadística) [20]. We also obtained the data  
111 on the total area of each CCAA [21], and percentage of total consolidated expenditure on  
112 hospital and specialized services in the CCAA from the annual report issued by the national  
113 health system, 2018 [22]. Finally, we also included two transmission-related metrics: the  
114 COVID-19 initial growth rate during the 15 days of local transmission and the cumulative  
115 morbidity rate given by the cumulative number cases divided by the local population size.  
116 Additionally, we obtained the shapefiles of the autonomous communities of Spain from the  
117 national geographic information system of Spain [23].

118

### 119 **Time-delay adjusted CFR estimation**

120

121 The crude CFR is defined as the number of cumulative deaths divided by the number of  
122 cumulative cases at a specific point in time. For the estimation of CFR in real time, we  
123 employed the delay from hospitalization to death,  $h_s$ , which is assumed to be given by  $h_s = H(s)$   
124  $- H(s-1)$  for  $s > 0$  where  $H(s)$  is a cumulative density function of the delay from hospitalization

125 to death and follows a gamma distribution with mean 10.1 days and SD 5.4 days, obtained from  
 126 the previously published paper [4]. Let  $\pi_{a,t_i}$  be the time-delay adjusted case fatality ratio on  
 127 reported day  $t_i$  in area  $a$ , the likelihood function of the estimate  $\pi_{a,t_i}$  is

$$L(\pi_{a,t_i}; c_{a,t}) = \prod_{t_i} \binom{\sum_{t=1}^{t_i} c_{a,t}}{D_{a,t_i}} \left( \pi_{a,t_i} \frac{\sum_{t=2}^{t_i} \sum_{s=1}^{t-1} c_{a,t-s} h_s}{\sum_{t=1}^{t_i} c_{a,t}} \right)^{D_{a,t_i}} \left( 1 - \pi_{a,t_i} \frac{\sum_{t=2}^{t_i} \sum_{s=1}^{t-1} c_{a,t-s} h_s}{\sum_{t=1}^{t_i} c_{a,t}} \right)^{\sum_{t=1}^{t_i} c_{a,t} - D_{a,t_i}}$$

128 where  $c_{a,t}$  represents the number of new cases with reported day  $t$  in area  $a$ , and  $D_{a,t_i}$  is the  
 129 cumulative number of deaths until reported day  $t_i$  in area  $a$  [14, 15]. Among the cumulative  
 130 cases with reported day  $t$  in area  $a$ ,  $D_{a,t_i}$  have died and the remainder have survived the  
 131 infection. The contribution of those who have died with biased death risk is shown in the  
 132 middle parenthetical term and the contribution of survivors is presented in the right  
 133 parenthetical term. We assume that  $D_{a,t_i}$  is the result of the binomial sampling process with  
 134 probability  $\pi_{a,t_i}$ .

135

136 We estimated model parameters using a Monte Carlo Markov Chain (MCMC) method in a  
 137 Bayesian framework. Posterior distributions of the model parameters were estimated by  
 138 sampling from the three Markov chains. For each chain, we drew 100,000 samples from the  
 139 posterior distribution after a burn-in of 20,000 iterations. Convergence of MCMC chains were  
 140 evaluated using the potential scale reduction statistic [24, 25]. Estimates and 95% credibility



141 intervals for these estimates are based on the posterior probability distribution of each  
142 parameter and based on the samples drawn from the posterior distributions.

143

#### 144 **Multivariate regression analysis**

145 We also explored the association between time-delay-adjusted CFR with population size,  
146 population density, proportion of population aged more than 60 years, infant mortality rate,  
147 population at risk of poverty as measured by poverty risk rate, consolidated public health  
148 expenditure on hospital and specialized services as well as with two transmission-related  
149 metrics: the cumulative morbidity rate of COVID-19 and the initial incidence growth rate  
150 across CCAAs. For this analysis, we built a multivariate linear regression model with all  
151 predictor variables to identify simplified models with significant factors linked to the variation  
152 in CFR estimates across geographic areas in Spain. We used stepwise regression method to  
153 build a final model that contained significant predictors.

154 All statistical analyses were conducted in R version 3.6.1 (R Foundation for Statistical  
155 Computing, Vienna, Austria).

156

#### 157 **Results:**

158 As of April 2, a total of 117,710 cases and 10,935 deaths due to COVID-19 have been reported  
159 in Spain. Moreover, the Madrid region has reported the highest number of cases at 34,188

160 (29%) and deaths at 4,483 (41%) followed by Catalunya with 23460 cases (19.9%) and 2335  
161 deaths (21.3%).

162

163 Figure 1 displays the observed and posterior estimates of crude case fatality ratio in Spain, 17

164 CCAAs and 2 autonomous cities (A) Spain (National), (B) Andalucia(AN), (C) Aragon(AR),

165 (D) Asturias(AS), (E) Balears(IB), (F) Canarias(CN), (G) Cantabria(CB), (H) Castilla-La

166 Mancha(CM), (I) Castilla y Leon(CL), (J) Catalunya(CT), (K) Ceuta(CE), (L)

167 C.Valenciana(VC), (M) Extremadura(EX), (N) Galicia(GA), (O) Madrid(MD), (P)

168 Melilla(ME), (Q) Murcia(MC), (R) Navarra(NC), (S) Pais Vasco(PV), and (T) La Rioja(RI).

169 Day 1 corresponds to March 1st in 2020. Black dots show the crude case fatality ratio, and light

170 and dark indicate 95% and 50% credible intervals for posterior estimates, respectively. Our

171 model-based crude CFR fitted the observed data well in all the regions except Aragon where

172 the model did not fit well for first 2 weeks. There was a rapid rise in crude CFR in the Madrid,

173 Castilla-La Mancha, and Catalunya, and also for the overall Spain.

174

175 Figure 2 illustrates observed and model based posterior estimates of time-delay-adjusted CFR

176 in the 20 areas. Black dots show crude case fatality ratios, and light and dark indicate 95% and

177 50% credible intervals for posterior estimates, respectively. Our posterior estimates of

178 time-delay adjusted CFR are higher than the crude observed CFR for AR, CM, CL, CT, VC,

179 MD, EX, PV, and at the national level. For AN, AS, CN, CB, CE, GA, ME, MC, and NC the  
180 time-delay-adjusted CFR are slightly higher than the crude CFR. Similarly, for IB the  
181 model-based estimates fit very well with the crude estimate. The graph of the time-delay  
182 adjusted CFR varies considerably for different areas. For instance, as the epidemic progresses,  
183 the adjusted CFR increases slightly in CN and NC while it shows the upward trend for first two  
184 weeks and then declines very slowly as in MD. For CM the graph shows upward trend for first  
185 two weeks, followed by a relative decline and then again moves upwards and then stays stable.  
186 Likewise, for AR, there was a very high early death rate for first two weeks after which it  
187 started to decline.

188

189 A summary of the time delay adjusted case fatality ratio, range of median estimates and crude  
190 CFR of COVID-19 across different areas of Spain are presented in Table 1. The Madrid  
191 autonomous community had the highest time delay adjusted CFR of 38.4% [95% credible  
192 interval: 38.0-38.8%] followed by Castilla-La Mancha (38.2%) [95%CrI: 37.3-39.1%],  
193 Catalunya (28.9%) [95%CrI: 28.4-29.4%], and Castilla y Leon (27.9%) (95%CrI:  
194 27.1-28.8%). The national estimate for Spain was 23.9% (95%CrI: 23.5-24.4%). Of the 19  
195 autonomous areas of Spain, 17 had the time-delay adjusted CFR greater than 10% (Table 1,  
196 figure 3).

197

198 Autonomous areas with higher proportion of population at risk of poverty, areas with a higher  
199 infant mortality rate and areas with higher cumulative morbidity rate experienced higher CFRs.  
200 These three significant factors explained 62.2% (62.2 is multiple R-squared and adjusted  
201 R-squared is 53.5%) of variance in the pandemic severity across CCAAs ( $P < 0.05$ ,  
202 Table 2). Figure 4 demonstrates the model-adjusted CFR, infant mortality rate, cumulative  
203 morbidity rate and poverty risk rate within the map of Spain for 17 CCAAs.

204

## 205 **Discussion**

206

207 In this paper, we have estimated the time delay adjusted case fatality ratio of COVID-19 for 19  
208 autonomous areas/cities of Spain. Our latest estimate of time-delay adjusted CFR in Spain was  
209 at 23.9%, but it varied widely across the 19 Spanish areas, with some areas exhibiting higher  
210 CFR values such as in Madrid (38.4%), and Castilla-La Mancha (38.2%) while other areas  
211 such as Melilla (3.9%), Galicia (8.2%) and Murcia (8.3%) experiencing relatively lower CFR  
212 values. We also observed a significant positive association of the time-delay adjusted CFR  
213 estimates across 17 Spanish areas with two socio-demographic factors: infant mortality rate,  
214 and poverty risk rate while cumulative morbidity rate was also positively associated with CFR.  
215 Our findings suggest the need for additional control efforts and medical resources particularly  
216 for lower socio-economic areas which have been particularly hit hard by the COVID-19  
217 pandemic.

218

219 The adjusted CFR estimates in Spain (23.9%) is higher than the estimates for Wuhan  
220 (12.2%)[4], and Korea (1.4%) [26] and Northwest Italy (23.0%)[12]. All of these studies  
221 employed same methods and hence are comparable. When we compare the estimates for the  
222 most affected areas across different countries, the rate in Madrid in Spain (38.4%) is higher  
223 than that estimated for Wuhan in China (12.2%) [4], Daegu in Korea (2.4%) [26] and  
224 Northwest, Italy (23.0%) [12]. This difference across countries and regions may be partly  
225 explained by differences in population age structure, density, other socio-demographic factors,  
226 and the scale of the pandemic in different areas. The median age in Spain (44.9 years) [27] is  
227 comparable to that of Italy (45.4 years) but higher than that for China (36.7 years) [28]. Indeed,  
228 the elderly population is at risk of severe outcomes from COVID-19 [29-31], which could  
229 partly explain the higher severity observed for Italy and Spain. Other factors that could have  
230 played a role in these differences may be related to differences in the definition of COVID-19  
231 death, and differences in testing strategies. For example, in Korea extensive testing and  
232 rigorous contact tracing strategy were implemented [32] while testing prioritized more severe  
233 cases in Italy [31] and Spain [33].

234

235 We found a significant positive association between CFR and the infant mortality rate, the  
236 poverty risk rate and the COVID-19 cumulative morbidity rate across areas in Spain. In fact,

237 these three variables explained more than 50% of the geographic variation in CFR. Infant  
238 mortality rate is an important indicator of an overall health of society while poverty risk rate  
239 reflects the socio-economic status of an area. In any pandemic situation like COVID-19, the  
240 poorer tend to exhibit the highest morbidity and mortality rates. For instance, lower  
241 socioeconomic groups were also disproportionately affected by the 1918 influenza pandemic  
242 [34, 35].

243

244 Those with the poor economic status have higher odds of having pre-existing conditions such  
245 as cardiovascular diseases, obesity, diabetes, and cancer [36-38]. According to  
246 WHO-China-joint mission on COVID-19, the patients with no comorbid conditions had a  
247 crude CFR of 1.4% compared to very higher rates among those with preexisting conditions.  
248 For example, 13.2% for those with cardiovascular disease, 9.2% for diabetes, 8.4% for  
249 hypertension, 8.0% for chronic respiratory disease, and 7.6% for cancer [10]. Moreover,  
250 preliminary COVID-19 mortality data from the US also indicates a 2-fold age-adjusted death  
251 rate among Hispanic/Latino and 1.9-fold among Black/African American compared to Whites  
252 [39].

253

254 In our study we saw considerable variations in CFR trend across areas. For instance, as the  
255 epidemic progressed, the adjusted CFR showed a slightly upward trend in CN and NC, a rapid

256 upward trend followed by the slow decline in MD, and a downward trend in AR. Likewise, for  
257 CM the graph showed an upward trend followed by a relative decline and then again an upward  
258 trend before staying stable. The CFR trend for the 19 autonomous areas can be helpful in the  
259 planning and implementation of health care services and prevention measures separately for  
260 each of them. The downward trend in CFR as seen in some of the areas in our study suggest the  
261 improvement in epidemiologic surveillance leading to the increased capture of mild or  
262 asymptomatic cases. A higher number of mild and asymptomatic cases also indicate an  
263 increase in human-to-human transmission leading to a prolonged epidemic which can be  
264 controlled through effective social distancing measures until an effective vaccine or treatment  
265 becomes available [4].

266

267 The upward trend in CFR indicates that the temporal disease burden exceeded the capacity of  
268 healthcare facilities and the surveillance system probably missed many cases during the early  
269 phase of the epidemic [4], particularly due to a significant presence of mild and asymptomatic  
270 cases. It has been found that about 18% of the COVID-19 infections in Diamond Princess  
271 Cruise ship were asymptomatic [40]. The increasing trend in CFR could further be explained  
272 the nosocomial transmission affecting the health care workers, inpatients and their visitors [4].  
273 In China, of 44672 confirmed COVID-19 cases, 3.8% was among the health care personnel

274 [41]. Similarly, Wang et al. in their study suspected 41% of the patients to have  
275 human-to-human hospital associated transmission of COVID-19 [42].

276

277 Our study has some limitations. The preferential ascertainment of severe cases bias in  
278 COVID-19 may have spuriously increased our estimate of CFR [3], which is a frequent caveat  
279 in this type of studies [43, 44]. Similarly, given the long infection-death time for COVID-19  
280 which ranges between 2 to 8 weeks [29], our estimate may have been affected by delayed  
281 reporting bias [3, 5]. Similarly, in our data, the date of report reflects the date of reporting and  
282 not the date of onset of illness. Finally, we assumed infant mortality and poverty risk rate as a  
283 proxy for areas with low socio-economic groups.

284

## 285 **Conclusion**

286 The risk of death due to COVID-19 in Spain was estimated at 23.9%, but estimates varied  
287 substantially across 19 geographic areas. The CFR was as high as 38% in Madrid (38.4%), and  
288 Castilla-La Mancha areas and as low as 4% in Melilla and 8% in Galicia and Murcia. Of the 19  
289 autonomous areas/cities, 16 had a time-delay-adjusted CFR greater than 10% reflecting a  
290 disproportionate severity burden of COVID-19 in Spain. Importantly, our estimate of CFR for  
291 the most affected Madrid region is higher than previous estimates for the most affected areas  
292 within China, Korea, and Italy. Our findings suggest a significant association of factors such as



293 infant mortality rate and poverty risk rate with the increased risk of death due to COVID-19.  
294 Further studies with patient level data on mortality, and risk factors could provide a more  
295 detailed understanding of the factors shaping the risk of death related to COVID-19.

296 **Note**

297 **Financial support.**

298 KM acknowledges support from the Japan Society for the Promotion of Science (JSPS)  
299 KAKENHI Grant Number 20H03940, and from the Leading Initiative for Excellent Young  
300 Researchers from the Ministry of Education, Culture, Sport, Science & Technology of Japan.  
301 GC acknowledges support from NSF grant 1414374 as part of the joint NSF-NIH-USDA  
302 Ecology and Evolution of Infectious Diseases program; UK Biotechnology and Biological  
303 Sciences Research Council grant BB/M008894/1.

304  
305

306 **Potential conflicts of interest.**

307 No conflict.

308

309 **References**

310 1. WHO, Coronavirus disease 2019 (COVID-19)-Situation report-82. 11 April 2020.

- 311 2. Mizumoto, K., et al., Estimating the risk of Middle East respiratory syndrome  
312 (MERS) death during the course of the outbreak in the Republic of Korea, 2015.  
313 *International Journal of Infectious Diseases*, **2015**. 39: p. 7-9.
- 314 3. Lipsitch, M., et al., Potential biases in estimating absolute and relative case-fatality  
315 risks during outbreaks. *PLoS neglected tropical diseases*, **2015**. 9(7).
- 316 4. Mizumoto, K. and G. Chowell, Estimating Risk for Death from 2019 Novel  
317 Coronavirus Disease, China, January-February 2020. *Emerging infectious diseases*,  
318 **2020**. 26(6).
- 319 5. Kucharski, A.J. and W.J. Edmunds, Case fatality rate for Ebola virus disease in west  
320 Africa. *The Lancet*, **2014**. 384(9950): p. 1260.
- 321 6. Lipsitch, M., D.L. Swerdlow, and L. Finelli, Defining the epidemiology of  
322 Covid-19—studies needed. *New England Journal of Medicine*, **2020**.
- 323 7. Reich, N.G., et al., Estimating absolute and relative case fatality ratios from infectious  
324 disease surveillance data. *Biometrics*, **2012**. 68(2): p. 598-606.
- 325 8. Wu, J.T., et al., Estimating clinical severity of COVID-19 from the transmission  
326 dynamics in Wuhan, China. *Nature Medicine*, **2020**.
- 327 9. Novel, C.P.E.R.E., The epidemiological characteristics of an outbreak of 2019 novel  
328 coronavirus diseases (COVID-19) in China. *Zhonghua liu xing bing xue za zhi=*  
329 *Zhonghua liuxingbingxue zazhi*, **2020**. 41(2): p. 145.

- 330 10. WHO, Report of the WHO-China Joint Mission on Coronavirus Disease 2019  
331 (COVID-19). **2020**, February.
- 332 11. Rodriguez-Morales, A.J., et al., Clinical, laboratory and imaging features of  
333 COVID-19: A systematic review and meta-analysis. *Travel Medicine and Infectious*  
334 *Disease*, **2020**: p. 101623.
- 335 12. Mizumoto, K., S. Dahal, and G. Chowell, Spatial variability in the risk of death from  
336 COVID-19 in Italy, **2020**. March 2020.
- 337 13. Chowell, G., et al., Spatial-temporal excess mortality patterns of the 1918–1919  
338 influenza pandemic in Spain. *BMC infectious diseases*, **2014**. 14(1): p. 371.
- 339 14. Nishiura, H., et al., Early epidemiological assessment of the virulence of emerging  
340 infectious diseases: a case study of an influenza pandemic. *PLoS One*, **2009**. 4(8).
- 341 15. Tsuzuki, S., et al., Dynamics of the pneumonic plague epidemic in Madagascar,  
342 August to October 2017. *Eurosurveillance*, **2017**. 22(46).
- 343 16. NSD. Spain-Administrative division 4/6/2020]; Available from:  
344 [https://nsd.no/european\\_election\\_database/country/spain/administrative\\_divisions.htm](https://nsd.no/european_election_database/country/spain/administrative_divisions.htm)  
345 [1](#)
- 346 17. Chavez, N. First case of coronavirus confirmed in Spain. January 31, **2020**  
347 3/31/2020].
- 348 18. WHO, Coronavirus disease 2019 (COVID-19): Situation reports 38, and 41. 2020.

- 349 19. Spain, M.o.H. Situation of COVID-19 in Spain **2020**; Available from:  
350 <https://covid19.isciii.es/>
- 351 20. INE. Resident population by date, sex and age. **2020**; Available from:  
352 [https://www.ine.es/dyngs/INEbase/es/operacion.htm?c=Estadistica\\_C&cid=12547361](https://www.ine.es/dyngs/INEbase/es/operacion.htm?c=Estadistica_C&cid=1254736176951&menu=ultiDatos&idp=1254735572981)  
353 [76951&menu=ultiDatos&idp=1254735572981](https://www.ine.es/dyngs/INEbase/es/operacion.htm?c=Estadistica_C&cid=1254736176951&menu=ultiDatos&idp=1254735572981)
- 354 21. Sawe, B.E. The Autonomous Communities Of Spain. Sept. 28, 2017; Available from:  
355 [worldatlas.com/articles/the-autonomous-communities-of-spain.html](http://worldatlas.com/articles/the-autonomous-communities-of-spain.html) .
- 356 22. Informe anual del sistema nacional de salud, 2018 MINISTERIO DE SANIDAD,  
357 CONSUMO Y BIENESTAR SOCIAL.
- 358 23. Geographical reference information 04/13/2020]; Available from:  
359 [http://centrodedescargas.cnig.es/CentroDescargas/equipamiento.do?method=mostrarE](http://centrodedescargas.cnig.es/CentroDescargas/equipamiento.do?method=mostrarEquipamiento)  
360 [quipamiento](http://centrodedescargas.cnig.es/CentroDescargas/equipamiento.do?method=mostrarEquipamiento)
- 361 24. Gamerman, D. and H.F. Lopes, Markov chain Monte Carlo: stochastic simulation for  
362 Bayesian inference. **2006**: CRC Press.
- 363 25. Gelman, A. and D.B. Rubin, Inference from iterative simulation using multiple  
364 sequences. *Statistical science*, **1992**. 7(4): p. 457-472.
- 365 26. Shim Eunha, et al., Estimating the risk of COVID-19 death during the course of the  
366 outbreak in Korea, February- March, 2020 **2020**.
- 367 27. Worldometer, Spain population. **2020**.

- 368 28. World Population Prospects 2019, Online Edition. Rev. 1. **2019**, United Nations,  
369 Department of Economic and Social Affairs, Population Division.
- 370 29. Organization, W.H., Report of the WHO-China Joint Mission on Coronavirus Disease  
371 2019 (COVID-19). **2020**, February.
- 372 30. Surveillances, V., The Epidemiological Characteristics of an Outbreak of 2019 Novel  
373 Coronavirus Diseases (COVID-19)—China, 2020. *China CDC Weekly*, **2020**. 2(8): p.  
374 113-122.
- 375 31. Onder, G., G. Rezza, and S. Brusaferro, Case-Fatality Rate and Characteristics of  
376 Patients Dying in Relation to COVID-19 in Italy. *JAMA*, **2020**.
- 377 32. Colbourn, T., COVID-19: extending or relaxing distancing control measures. The  
378 *Lancet Public Health*, **2020**.
- 379 33. Linde, P., Spain's coronavirus crisis: Why the numbers are failing to show the full  
380 picture, in El Pais. April 5, **2020**.
- 381 34. Dahal, S., et al., Natality decline and spatial variation in excess death rates during the  
382 1918–1920 influenza pandemic in Arizona, United States. *American journal of*  
383 *epidemiology*, **2018**. 187(12): p. 2577-2584.
- 384 35. Mamelund, S.E., 1918 pandemic morbidity: The first wave hits the poor, the second  
385 wave hits the rich. *Influenza and other respiratory viruses*, **2018**. 12(3): p. 307-313.

- 386 36. Everson, S.A., et al., Epidemiologic evidence for the relation between socioeconomic  
387 status and depression, obesity, and diabetes. *Journal of psychosomatic research*,  
388 **2002**. 53(4): p. 891-895.
- 389 37. Clark, A.M., et al., Socioeconomic status and cardiovascular disease: risks and  
390 implications for care. *Nature Reviews Cardiology*, **2009**. 6(11): p. 712.
- 391 38. Clegg, L.X., et al., Impact of socioeconomic status on cancer incidence and stage at  
392 diagnosis: selected findings from the surveillance, epidemiology, and end results:  
393 National Longitudinal Mortality Study. *Cancer causes & control*, **2009**. 20(4): p.  
394 417-435.
- 395 39. Age adjusted fatal lab confirmed COVID-19 cases per 100,000 by race/ethnicity  
396 group. April 6, **2020**.
- 397 40. Mizumoto, K., et al., Estimating the asymptomatic proportion of coronavirus disease  
398 2019 (COVID-19) cases on board the Diamond Princess cruise ship, Yokohama,  
399 Japan, 2020. *Eurosurveillance*, **2020**. 25(10).
- 400 41. Wu, Z. and J.M. McGoogan, Characteristics of and important lessons from the  
401 coronavirus disease 2019 (COVID-19) outbreak in China: summary of a report of 72  
402 314 cases from the Chinese Center for Disease Control and Prevention. *Jama*, **2020**.
- 403 42. Wang, D., et al., Clinical characteristics of 138 hospitalized patients with 2019 novel  
404 coronavirus–infected pneumonia in Wuhan, China. *Jama*, **2020**.

- 405 43. Yu, H., et al., Human infection with avian influenza A H7N9 virus: an assessment of  
406 clinical severity. *The Lancet*, **2013**. 382(9887): p. 138-145.
- 407 44. Cauchemez, S., et al., Middle East respiratory syndrome coronavirus: quantification  
408 of the extent of the epidemic, surveillance biases, and transmissibility. *The Lancet*  
409 *infectious diseases*, **2014**. 14(1): p. 50-56.
- 410

411 **Table 1. Summary results of time-delay adjusted case fatality ratio of COVID-19 in the**  
 412 **two areas in Spain, 2020 (As of Apr 2, 2020)**

| Area                   | Latest estimate                          | Range of median estimates<br>during the study period | Crude CFR                                           |
|------------------------|------------------------------------------|------------------------------------------------------|-----------------------------------------------------|
| Spain (National)       | 23.9% (95%CrI <sup>S</sup> : 23.5-24.4%) | 23.9-39.9%                                           | 9.1% (95%CI <sup>L</sup> :9.3-9.5%)<br>10935/117710 |
| Andalucia(AN)          | 14.6% (95%CrI: 14.0-15.2%)               | 2.5-16.0%                                            | 4.0% (95%CrI: 3.9-4.2)<br>2614/64604                |
| Aragon(AR)             | 23.9% (95%CrI: 22.6-25.2%)               | 23.9-94.8%                                           | 6.0% (95%CrI: 5.7-6.3%)<br>1401/23378               |
| Asturias(AS)           | 10.6% (95%CrI: 9.6-11.6%)                | 5.3-19.4%                                            | 3.4% (95%CrI: 3.1-3.7%)<br>518/15111                |
| Balears(IB)            | 12.1% (95%CrI: 10.9-13.4%)               | 7.5-12.7%                                            | 3.4 (95%CrI: 3.1-3.7%)<br>398/11769                 |
| Canarias(CN)           | 11.7% (95%CrI: 10.7-12.8%)               | 2.2-11.7%                                            | 3.5 (95%CrI: 3.2-3.8%)<br>503/14512                 |
| Cantabria(CB)          | 12.3% (95%CrI: 10.9-13.6%)               | 1.8-12.9%                                            | 3.1% (95%CrI: 2.8-3.4%)<br>367/11940                |
| Castilla-La Mancha(CM) | 38.2% (95%CrI: 37.3-39.1%)               | 5.9-41.3%                                            | 9.6% (95%CrI: 9.4-9.8%)<br>6532/68044               |
| Castilla y Leon(CL)    | 27.9% (95%CrI: 27.1-28.8%)               | 3.0-32.9%                                            | 7.0% (95%CrI: 6.9-7.2%)<br>4702/66755               |
| Catalunya(CT)          | 28.9% (95%CrI: 28.4-29.4%)               | 10.0-31.0%                                           | 7.4% (95%CrI: 7.3-7.6%)<br>14803/199112             |
| Ceuta(CE)              | 15.4% (95%CrI: 6.8-30.0%)                | 14.5-18.1%                                           | 2.1% (95%CrI: 0.8-4.3%)<br>7/333                    |
| C.Valenciana(VC)       | 21.5% (95%CrI: 20.7-22.3%)               | 4.4-25.2%                                            | 5.8% (95%CrI: 5.6-6.0%)<br>3446/59437               |
| Extremadura(EX)        | 26.6% (95%CrI: 25.0-28.1%)               | 10.9-28.1%                                           | 7.0% (95%CrI: 6.6-7.4%)<br>1232/17541               |
| Galicia(GA)            | 8.2% (95%CrI: 7.6-8.8%)                  | 8.2-12.9%                                            | 2.0% (95%CrI:1.8-2.1%)<br>798/40748                 |
| Madrid(MD)             | 38.4% (95%CrI: 38.0-38.8%)               | 21.1-53.0%                                           | 11.9% (95%CrI: 11.8-12.0%)<br>38895/326003          |
| Meliilla(ME)           | 3.9% (95%CrI: 1.7-7.1%)                  | 2.8-4.3%                                             | 1.4% (95%CrI: 0.7-2.5%)<br>10/722                   |
| Murcia(MC)             | 8.3% (95%CrI: 7.3-9.5%)                  | 1.3-8.3%                                             | 2.4% (95%CrI: 2.1-2.7%)<br>256/10781                |



|                |                            |            |                                       |
|----------------|----------------------------|------------|---------------------------------------|
| Navarra(NC)    | 13.1% (95%CrI: 12.3-14.0%) | 3.4-13.1%  | 3.9% (95%CrI: 3.6-4.1%)<br>1024/26533 |
| Pais Vasco(PV) | 16.9% (95%CrI: 16.4-17.5%) | 16.9-41.1% | 4.9% (95%CrI: 4.8-5.1%)<br>3633/73751 |
| La Rioja(RI)   | 11.0% (95%CrI:10.3-11.8% ) | 5.5-14.8%  | 3.8% (95%CrI: 3.5-4.0%)<br>849/22427  |

---

413 §CrI: 95% credibility intervals (CrI), ¶95%CI: 95% confidence interval

414

415

416

417 **Table 2. Final multivariate regression model of time-delay-adjusted CFR as a function of**  
 418 **socio-demographic variables across autonomous communities of Spain**  
 419

| Predictor                 | Coefficient | Standard error | p-value | Intercept |
|---------------------------|-------------|----------------|---------|-----------|
| Infant mortality rate     | 0.979       | 0.437          | 0.043   | 2.239     |
| Poverty risk rate         | 0.781       | 0.248          | 0.007   |           |
| Cumulative morbidity rate | 0.892       | 0.195          | 0.0005  |           |

420

421 **Figure legend**

422 **Fig 1: Temporal variation of risk of death caused by COVID-19 by area, Spain, March-April,**

423 **2020: crude case fatality rate (cCFR)**

424 Observed and posterior estimates of crude case fatality ratio in (A) Spain (National), (B) Andalucia(AN),(C)

425 Aragon(AR), (D) Asturias(AS),(E) Balears(IB),(F) Canarias(CN),(G) Cantabria(CB),(H) Castilla-La

426 Mancha(CM),(I) Castilla y Leon(CL), (J) Catalunya(CT),(K) Ceuta(CE),(L) C.Valenciana(VC),(M)

427 Extremadura(EX),(N) Galicia(GA),(O) Madrid(MD),(P) Melilla(ME),(Q) Murcia(MC),(R) Navarra(NC),(S)

428 Pais Vasco(PV), and (T) La Rioja(RI). Day 1 corresponds to March 1<sup>st</sup> in 2020. Black dots show crude case

429 fatality ratio, and light and dark indicate 95% and 50% credible intervals for posterior estimates, respectively.

430

431 **Fig 2: Temporal variation of risk of death caused by COVID-19 by area, Spain, March-April,**

432 **2020: time-delay adjusted case fatality rate**

433 Observed and posterior estimates of time-delay adjusted case fatality ratio in in (A) Spain (National), (B)

434 Andalucia(AN),(C) Aragon(AR), (D) Asturias(AS),(E) Balears(IB),(F) Canarias(CN),(G) Cantabria(CB),(H)

435 Castilla-La Mancha(CM),(I) Castilla y Leon(CL), (J) Catalunya(CT),(K) Ceuta(CE),(L) C.Valenciana(VC),(M)

436 Extremadura(EX),(N) Galicia(GA),(O) Madrid(MD),(P) Melilla(ME),(Q) Murcia(MC),(R) Navarra(NC),(S)

437 Pais Vasco(PV), and (T) La Rioja(RI). Day 1 corresponds to March 1<sup>st</sup> in 2020. Black dots show crude case

438 fatality ratio, and light and dark indicate 95% and 50% credible intervals for posterior estimates, respectively.

439

440 **Figure 3. Latest estimates of time-delay adjusted risk of death caused by COVID-19 by area,**  
441 **2020, Spain.**

442 Distribution of time-delay adjusted case fatality risks derived from the latest estimates (April 2, 2020) are  
443 presented. Top to bottom: (A)Spain (National), (B) Andalucia(AN), (C)Aragon(AR), (D) Asturias(AS),(E)  
444 Balears(IB), (F) Canarias(CN), (G) Cantabria(CB), (H) Castilla-La Mancha(CM), (I) Castilla y Leon(CL), (J)  
445 Catalunya(CT), (K) Ceuta(CE),(L) C.Valenciana(VC),(M) Extremadura(EX),(N) Galicia(GA),(O)  
446 Madrid(MD),(P) Melilla(ME),(Q) Murcia(MC),(R) Navarra(NC),(S) Pais Vasco(PV), and (T) La Rioja(RI)  
447

448 **Figure 4. Geographical variability of COVID-19 time-delay adjusted CFR, pervert risk, infant**  
449 **mortality rate and cumulative morbidity rate across 17 autonomous communities, Spain, 2 April**  
450 **2020.**

451 Distribution of time-delay adjusted case fatality risks derived from the latest estimates (April 2, 2020) are  
452 presented. Top to b (A) time –delay adjusted case fatality rate as at April 2 2020 (B) poverty risk in 2017 (C)  
453 Infant mortality risk per 1000 birth in 2016 (D) cumulative morbidity rate as at April 2 2020.

Spain (National)

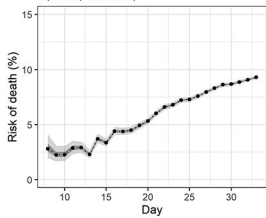

Andalucia (AN)

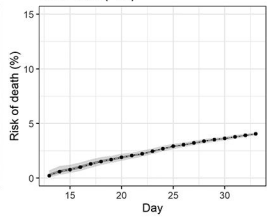

Aragon (AR)

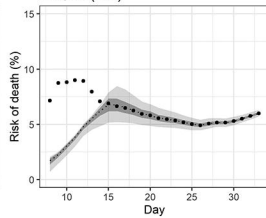

Asturias (AS)

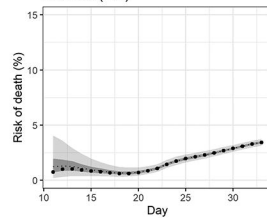

Balears (IB)

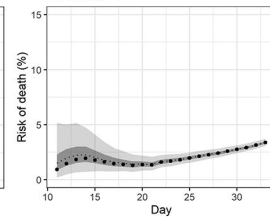

Canarias (CN)

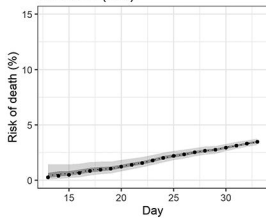

Cantabria (CB)

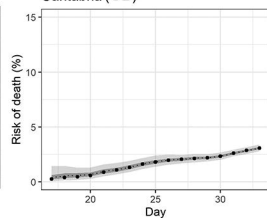

Castilla-La Mancha (CM)

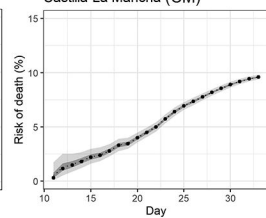

Castilla y Leon (CL)

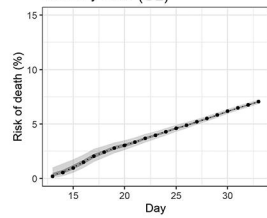

Catalunya (CT)

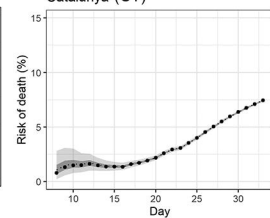

Ceuta (CE)

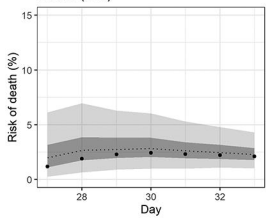

C.Valenciana (VC)

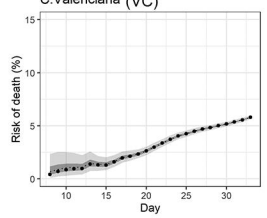

Extremadura (EX)

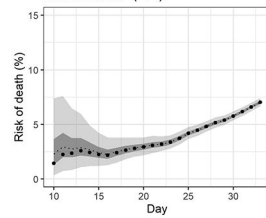

Galicia(GA)

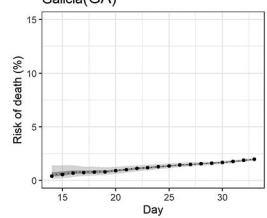

Madrid (MD)

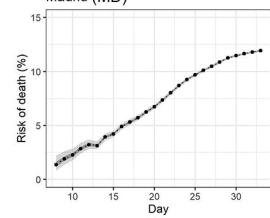

Melilla (ME)

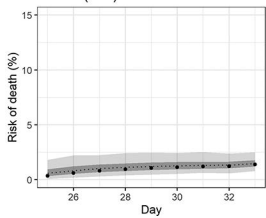

Murcia (MC)

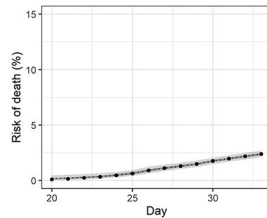

Navarra (NC)

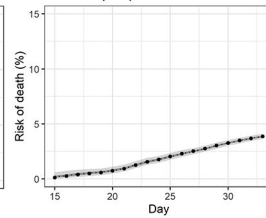

Pais Vasco (PV)

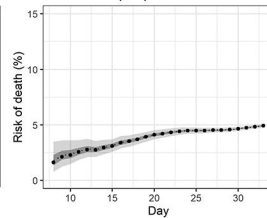

La Rioja (RI)

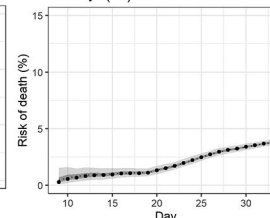

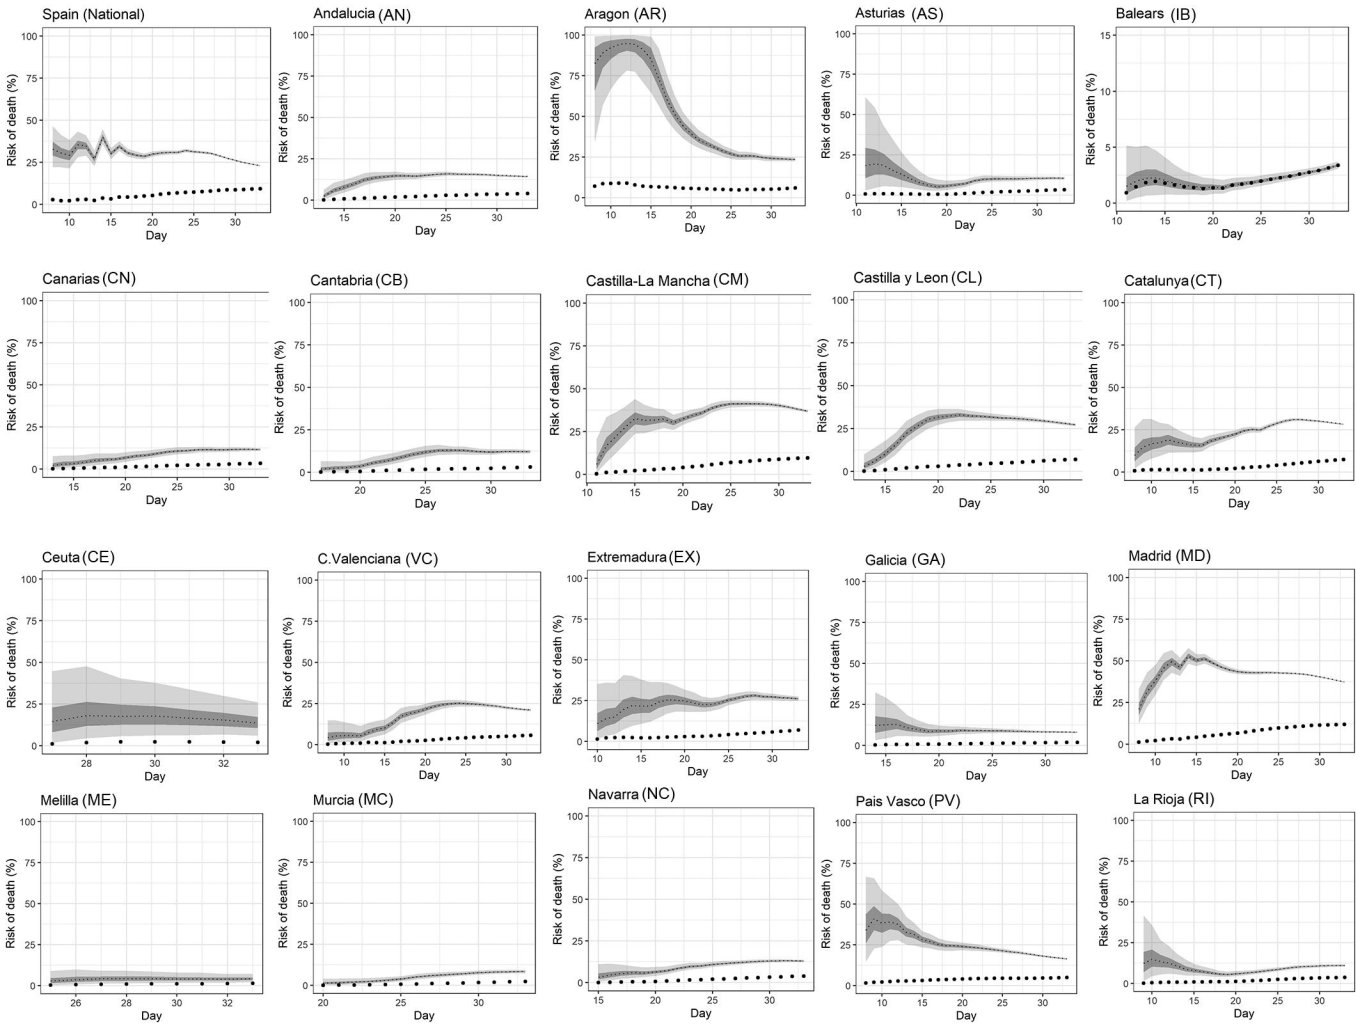

Time delay adjusted CFR by area  
The latest estimate

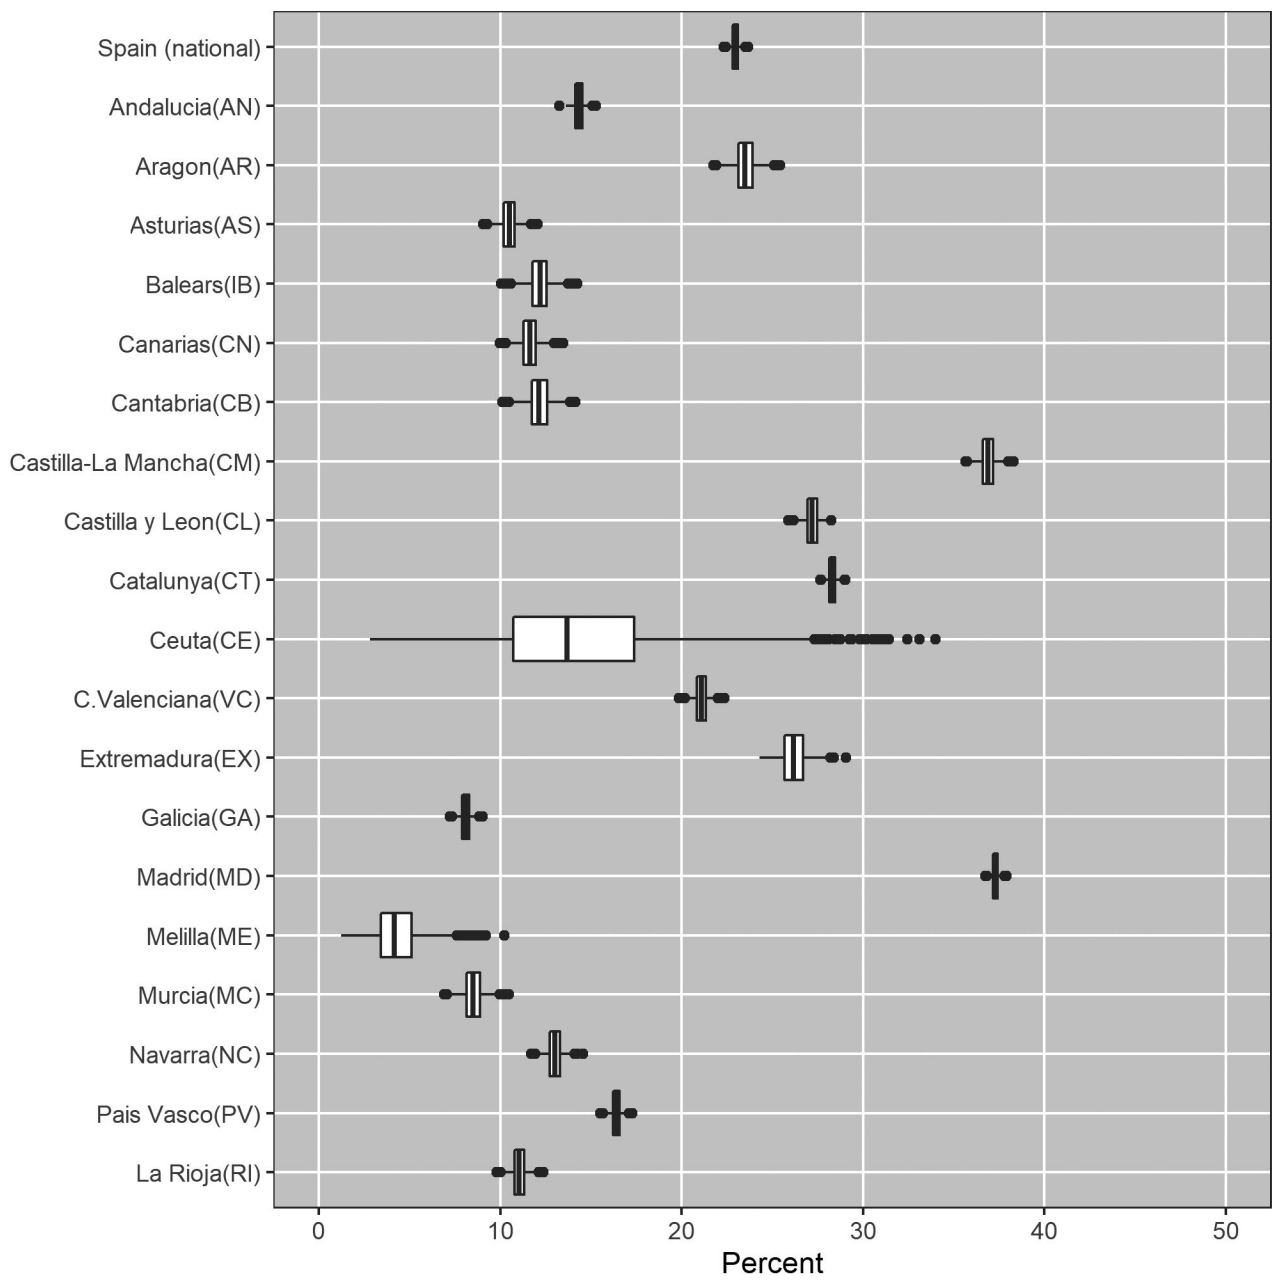

A

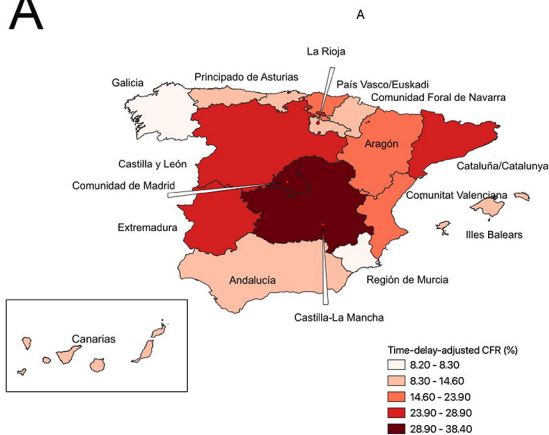

B

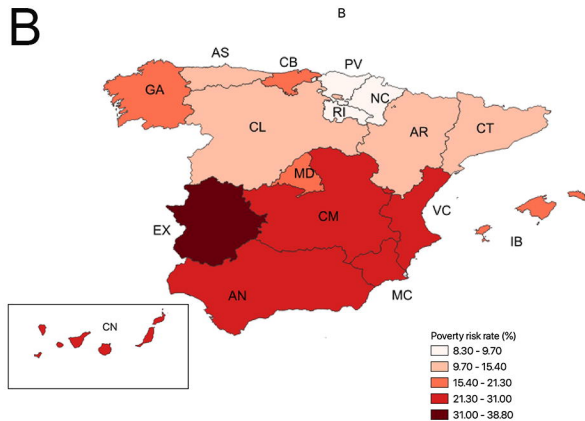

C

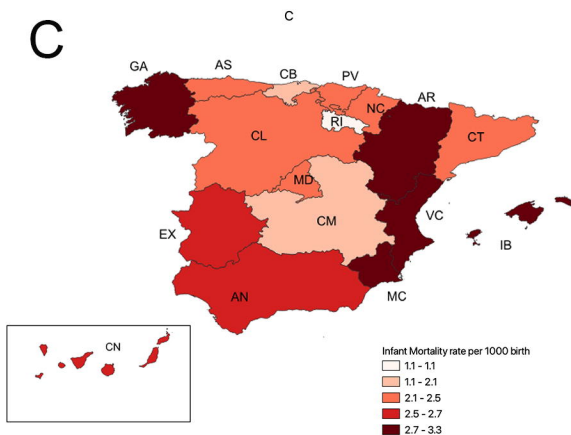

D

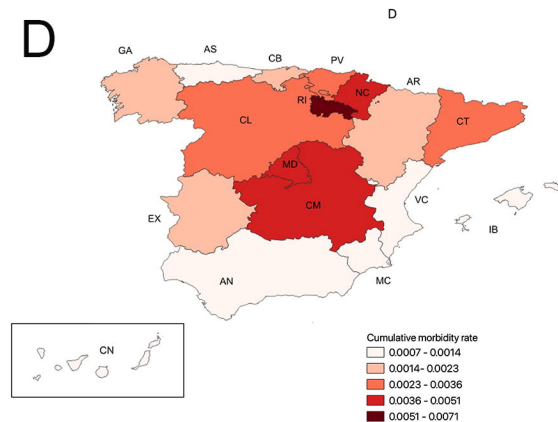

Source: https://www.medrxiv.org/content/10.1101/2020.04.14.20065524v2.full.pdf
